# Supplementary material for: Exploring the reactive chemistry of FOX-7: synthesis of cyclic triazinane-based energetic materials featuring the FOX-7 backbone
Source: Royal Society of Chemistry journal article supplement (doi:10.1039/c9nj01932d), 2019-01-01
Supplement: c9nj01932d1.pdf [file c9nj01932d1.pdf]

## ***New Journal of Chemistry***

### **Exploring the Reactive Chemistry of FOX-7: Synthesis of Cyclic Triazinane-Based Energetic Materials Featuring FOX-7 Backbone**

Chao Yan,<sup>a</sup> Guangbin Cheng,<sup>a</sup> Kangcai Wang,<sup>b</sup> Tianlin Liu,<sup>b</sup> Yunhe Jin,<sup>b</sup> Hongwei Yang<sup>†a</sup> and Qinghua Zhang<sup>†b</sup>

---

<sup>a</sup> *School of Chemical Engineering, Nanjing University of Science and Technology,  
Nanjing, 210000 China*

*E-mail: hYang@mail.njust.edu.cn*

<sup>b</sup> *Research Center of Energetic Material Genome Science, Institute of Chemical Materials, China Academy of Engineering Physics (CAEP),  
Mianyang, 621900, P. R. China.*

*E-mail: qinghuazhang@caep.cn*

## Supporting Information

### Table of Contents

|                                                          |    |
|----------------------------------------------------------|----|
| I. The crystallographic data and crystal structures..... | 1  |
| II. Theoretical study.....                               | 12 |
| References.....                                          | 12 |

# I. The crystallographic data and crystal structures

**Table S1.** X-ray data and parameters of **1**, **2**, **2·H<sub>2</sub>O**, **3** and **5**.

|                                              | <b>1</b>                                                    | <b>2</b>                                                      | <b>2·H<sub>2</sub>O</b>                                       | <b>3</b>                                                     | <b>5</b>                                                           |
|----------------------------------------------|-------------------------------------------------------------|---------------------------------------------------------------|---------------------------------------------------------------|--------------------------------------------------------------|--------------------------------------------------------------------|
| Chemical formula                             | C <sub>5</sub> H <sub>5</sub> N <sub>7</sub> O <sub>8</sub> | C <sub>9</sub> H <sub>14</sub> N <sub>10</sub> O <sub>8</sub> | C <sub>9</sub> H <sub>16</sub> N <sub>10</sub> O <sub>9</sub> | C <sub>8</sub> H <sub>8</sub> N <sub>8</sub> O <sub>10</sub> | C <sub>12</sub> H <sub>21</sub> ClN <sub>9</sub> O <sub>8.13</sub> |
| Formula mass                                 | 291.16                                                      | 390.30                                                        | 408.32                                                        | 352.20                                                       | 456.83                                                             |
| Crystal system                               | orthorhombic                                                | orthorhombic                                                  | monoclinic                                                    | monoclinic                                                   | monoclinic                                                         |
| a/Å                                          | 11.757(3)                                                   | 16.894(4)                                                     | 17.038(4)                                                     | 13.475(6)                                                    | 13.790(2)                                                          |
| b/Å                                          | 12.706(3)                                                   | 9.096(2)                                                      | 7.1500(16)                                                    | 8.538(4)                                                     | 7.0973(11)                                                         |
| c/Å                                          | 13.594(3)                                                   | 9.676(4)                                                      | 13.854(3)                                                     | 13.241(6)                                                    | 19.700(3)                                                          |
| α/°                                          | 90                                                          | 90                                                            | 90                                                            | 90                                                           | 90                                                                 |
| β/°                                          | 90                                                          | 90                                                            | 99.084(6)                                                     | 115.838(11)                                                  | 98.238(4)                                                          |
| γ/°                                          | 90                                                          | 90                                                            | 90                                                            | 90                                                           | 90                                                                 |
| Volume/Å <sup>3</sup>                        | 2030.8(8)                                                   | 1486.9(8)                                                     | 1666.6(7)                                                     | 1371.1(11)                                                   | 1908.2(5)                                                          |
| Temperature/K                                | 173                                                         | 173                                                           | 173                                                           | 173                                                          | 173                                                                |
| Space group                                  | <i>Pbca</i>                                                 | <i>Pccn</i>                                                   | <i>P2<sub>1</sub>/c</i>                                       | <i>P2<sub>1</sub>/c</i>                                      | <i>P2<sub>1</sub>/n</i>                                            |
| Z                                            | 8                                                           | 4                                                             | 4                                                             | 4                                                            | 4                                                                  |
| Radiation type                               | Mo-Kα                                                       | Mo-Kα                                                         | Mo-Kα                                                         | Mo-Kα                                                        | Mo-Kα                                                              |
| μ/mm <sup>-1</sup>                           | 0.180                                                       | 0.153                                                         | 0.145                                                         | 0.162                                                        | 0.267                                                              |
| Density <sub>calcd</sub> /g cm <sup>-3</sup> | 1.905                                                       | 1.743                                                         | 1.627                                                         | 1.706                                                        | 1.588                                                              |
| F(000)                                       | 1184.0                                                      | 808.0                                                         | 848.0                                                         | 720.0                                                        | 946.0                                                              |
| 2θ range for data collection/°               | 5.592 to 54.83                                              | 4.8 to 50.2                                                   | 2.4 to 52.8                                                   | 3.358 to 55.198                                              | 3.80 to 54.8                                                       |
| Index ranges                                 | -15/15; -15/15; -17/17                                      | -20/19; -10/10; -11/10                                        | -21/21; -8/8; -17/17                                          | -17/15; -11/11; -16/17                                       | -17/15; -9/9; -25/25                                               |
| Reflections collected                        | 11814                                                       | 5877                                                          | 11113                                                         | 12162                                                        | 16374                                                              |
| Independent reflections                      | 2285                                                        | 1329                                                          | 3399                                                          | 3142                                                         | 4304                                                               |
| R <sub>int</sub>                             | 0.0788                                                      | 0.192                                                         | 0.089                                                         | 0.1203                                                       | 0.085                                                              |
| Data/restraints/parameters                   | 2285/0/181                                                  | 1329/120/133                                                  | 3399/0/260                                                    | 3142/0/217                                                   | 4304/9/311                                                         |
| R <sub>1</sub> / wR <sub>2</sub> [all data]  | 0.0818/0.1246                                               | 0.1738/0.0735                                                 | 0.1386/0.1949                                                 | 0.1813/0.1879                                                | 0.1234/0.1716                                                      |
| R <sub>1</sub> / wR <sub>2</sub> [I > 2σ(I)] | 0.0496/0.1081                                               | 0.0618/0.0735                                                 | 0.0563/0.1541                                                 | 0.0676/0.1449                                                | 0.0606/0.1666                                                      |
| Goodness-of-fit on F <sup>2</sup>            | 1.040                                                       | 1.01                                                          | 1.01                                                          | 1.001                                                        | 1.02                                                               |
| CCDC number                                  | 1891351                                                     | 1892967                                                       | 1892962                                                       | 1892968                                                      | 1892969                                                            |

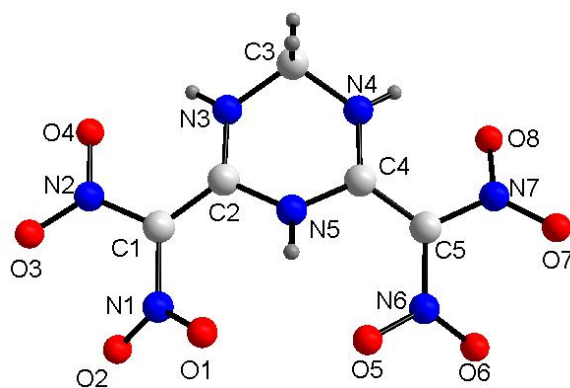

**Figure S1.** The crystal structure of compound 1.

**Table S2.** The bonds length of compound 1

| Parameter | Bond length (Å) | Parameter | Bond length (Å) |
|-----------|-----------------|-----------|-----------------|
| O5-N6     | 1.244(2)        | N4-C3     | 1.458(3)        |
| O6-N6     | 1.225(2)        | N7-C5     | 1.422(3)        |
| O8-N7     | 1.240(3)        | N3-C2     | 1.312(3)        |
| O7-N7     | 1.227(3)        | N3-C3     | 1.451(3)        |
| O1-N1     | 1.242(3)        | O2-N1     | 1.224(3)        |
| N5-C4     | 1.373(3)        | O4-N2     | 1.248(3)        |
| N5-C2     | 1.374(3)        | N1-C1     | 1.432(3)        |
| N6-C5     | 1.419(3)        | N2-C1     | 1.409(3)        |
| O3-N2     | 1.234(3)        | C4-C5     | 1.423(3)        |
| N4-C4     | 1.309(3)        | C2-C1     | 1.412(3)        |

**Table S3.** The bonds angles of compound 1

| Parameter | Bond angle (°) | Parameter | Bond length (Å) |
|-----------|----------------|-----------|-----------------|
| C4-N5-C2  | 122.14(19)     | O4-N2-C1  | 117.8(2)        |
| O5-N6-C5  | 118.17(19)     | N5-C4-C5  | 120.07(19)      |
| O6-N6-O5  | 121.4 (2)      | N4-C4-N5  | 115.8(2)        |
| O6-N6-C5  | 120.45(19)     | N4-C4-C5  | 124.1(2)        |
| C4-N4-C3  | 118.17(19)     | N5-C2-C1  | 119.4(2)        |
| O8-N7-C5  | 117.8(2)       | N3-C2-N5  | 115.2(2)        |
| O7-N7-O8  | 121.9(2)       | N3-C2-C1  | 125.3(2)        |
| O7-N7-C5  | 120.3(2)       | N6-C5-N7  | 116.71(19)      |
| C2-N3-C3  | 118.5(2)       | N6-C5-C4  | 112.9(2)        |
| O1-N1-C1  | 118.4(2)       | N7-C5-C4  | 120.3(2)        |
| O2-N1-O1  | 122.4(2)       | N2-C1-N1  | 116.0(2)        |

|          |          |          |           |
|----------|----------|----------|-----------|
| O2-N1-C1 | 119.2(2) | N2-C1-C2 | 121.2(2)  |
| O3-N2-O4 | 121.7(2) | C2-C1-N1 | 122.1(2)  |
| O3-N2-C1 | 120.5(2) | N3-C3-N4 | 107.8(18) |

**Table S4.** The torsion angles of compound 1

| Parameter   | Torsion angle (°) | Parameter   | Torsion angle (°) |
|-------------|-------------------|-------------|-------------------|
| O1-N1-C1-N2 | -142.7(2)         | C4-N5-C2-N3 | -24.0(3)          |
| O1-N1-C1-C2 | 28.0(3)           | C4-N5-C2-C1 | 153.4(2)          |
| O2-N1-C1-N2 | 37.7(3)           | C2-N5-C4-N4 | 25.3(3)           |
| O2-N1-C1-C2 | -151.6(2)         | C2-N5-C4-C5 | -154.5(2)         |
| O3-N2-C1-N1 | 5.6(3)            | O5-N6-C5-N7 | 167.3(2)          |
| O3-N2-C1-C2 | -165.2(2)         | O5-N6-C5-C4 | -15.9(3)          |
| O3-N2-C1-C2 | -175.9(2)         | O6-N6-C5-N7 | -14.3(3)          |
| O4-N2-C1-C2 | 13.3(3)           | O6-N6-C5-C4 | 162.5(2)          |
| C3-N3-C2-N5 | -14.6(3)          | O7-N7-C5-N6 | -26.7(3)          |
| C3-N3-C2-C1 | 168.3(2)          | O7-N7-C5-C4 | 156.4(2)          |
| C2-N3-C3-N4 | 46.4(3)           | O8-N7-C5-N6 | 154.1(2)          |
| C4-N4-C3-C3 | -44.8(3)          | O8-N7-C5-C4 | -22.9(3)          |
| C3-N4-C4-N5 | 12.0(3)           | N1-C1-C2-N3 | 179.2(2)          |
| C3-N4-C4-C5 | -168.2(2)         | N1-C1-C2-N5 | 2.1(3)            |
| N2-C1-C2-N3 | -10.6(4)          | N4-C4-C5-N7 | 5.2(3)            |
| N2-C1-C2-N5 | 172.3(2)          | N5-C4-C5-N6 | 8.3(3)            |
| N4-C4-C5-N6 | -171.5(2)         | N5-C4-C5-N7 | -174.99(19)       |

**Table S5.** The hydrogen bonds in compound 1

| D-H...A     | D-H(Å) | H...A(Å) | D...A(Å) | D-H...A(o) |
|-------------|--------|----------|----------|------------|
| N3—H3...O4  | 0.8800 | 2.0100   | 2.584(3) | 122        |
| N3—H3...O8  | 0.8800 | 2.3200   | 3.092(3) | 147        |
| N4—H4...O8  | 0.8800 | 1.9800   | 2.590(3) | 126        |
| N4—H4...O5  | 0.8800 | 2.2500   | 2.893(3) | 130        |
| N5—H5...O1  | 0.8800 | 1.9900   | 2.621(3) | 127        |
| N5—H5...O5  | 0.8800 | 2.0000   | 2.560(3) | 121        |
| N5—H5...O3  | 0.8800 | 2.4400   | 3.000(3) | 122        |
| C3—H3B...O3 | 0.9900 | 2.5100   | 3.280(3) | 135        |
| C3—H3B...O7 | 0.9900 | 2.4800   | 3.329(3) | 143        |
| C3—H3B...O5 | 0.9900 | 2.4900   | 3.119(3) | 121        |

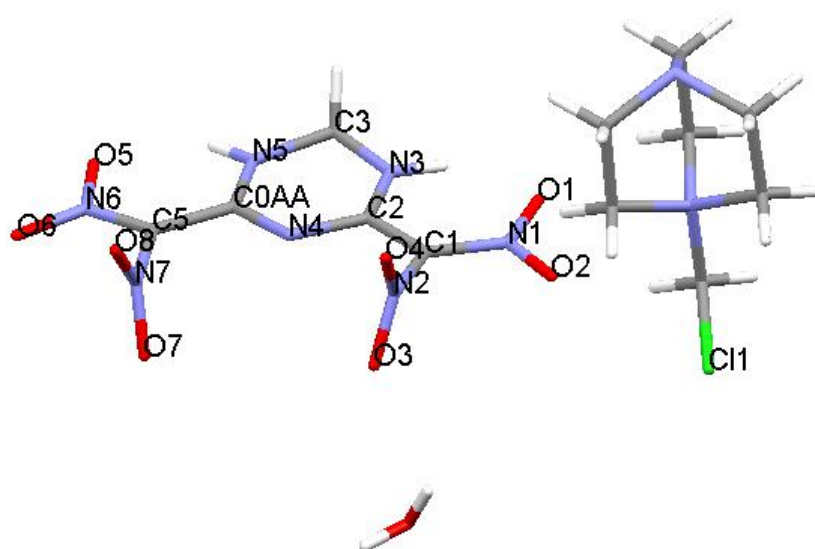

**Figure S2.** The crystal structure of organic salt **5**.

**Table S6.** The bonds length of anion in organic salt **5**

| Parameter | Bond length (Å) | Parameter | Bond length (Å) |
|-----------|-----------------|-----------|-----------------|
| O6-N6     | 1.259(3)        | N4-C0AA   | 1.335(4)        |
| N7-O8     | 1.216(4)        | N4-C2     | 1.347(4)        |
| N7-O7     | 1.213(4)        | C0AA-C5   | 1.411(4)        |
| N7-C5     | 1.456(4)        | N1-O2     | 1.243(4)        |
| N6-O5     | 1.250(3)        | N1-O1     | 1.256(5)        |
| N6-C5     | 1.346(4)        | N1-C1     | 1.365(5)        |
| N5-C0AA   | 1.309(4)        | C2-C1     | 1.402(5)        |
| N5-C3     | 1.441(4)        | N2-C1     | 1.44(3)         |
| N3-C2     | 1.308(4)        | N2-O4     | 1.24(4)         |
| N3-C3     | 1.428(5)        | N2-O3     | 1.23(5)         |

**Table S7.** The bonds angles of anion in organic salt **5**

| Parameter  | Bond angle (°) | Parameter  | Bond length (Å) |
|------------|----------------|------------|-----------------|
| O8-N7-C5   | 118.1(3)       | C0AA-C5-N7 | 118.3(3)        |
| O7-N7-O8   | 124.1(3)       | O2-N1-O1   | 122.0(4)        |
| O7-N7-C5   | 117.9(3)       | O2-N1-C1   | 119.5(4)        |
| O6-N6-C5   | 119.5(2)       | O1-N1-C1   | 118.4(3)        |
| O5-N6-O6   | 121.1(3)       | N3-C2-N4   | 122.5(3)        |
| O5-N6-C5   | 119.4(3)       | N3-C2-C1   | 121.7(3)        |
| C0AA-N5-C3 | 123.3(3)       | N4-C2-C1   | 115.8(3)        |

|            |          |          |           |
|------------|----------|----------|-----------|
| C2-N3-C3   | 124.4(3) | O4-N2-C1 | 123(3)    |
| C0AA-N4-C2 | 116.4(3) | O3-N2-C1 | 117(3)    |
| N5-C0AA-N4 | 123.5(3) | O3-N2-O4 | 121(3)    |
| N5-C0AA-C5 | 121.1(3) | N1-C1-C2 | 126.9(3)  |
| N4-C0AA-C5 | 115.4(3) | N1-C1-N2 | 115.5(11) |
| N6-C5-N7   | 114.5(3) | C2-C1-N2 | 117.1(11) |
| N6-C5-C0AA | 127.3(3) | N3-C3-N5 | 109.1(3)  |

**Table S8.** The torsion angles of anion in organic salt **5**

| Parameter     | Torsion angle (°) | Parameter     | Torsion angle (°) |
|---------------|-------------------|---------------|-------------------|
| O1-N1-C1-N2   | 172.4(12)         | C3-N5-C0AA-C5 | 176.5(3)          |
| O1-N1-C1-C2   | -1.4(5)           | O5-N6-C5-C0AA | 0.9(5)            |
| O2-N1-C1-N2   | -7.0(13)          | O6-N6-C5-N7   | -0.6(4)           |
| O2-N1-C1-C2   | 179.2(3)          | O6-N6-C5-C0AA | 179.2(3)          |
| O3-N2-C1-C2   | 93(2)             | O5-N6-C5-N7   | -179.0(3)         |
| O4-N2-C1-N1   | 100(2)            | O7-N7-C5-N6   | 96.1(3)           |
| O3-N2-C1-N1   | -82(2)            | O7-N7-C5-C0AA | -83.8(4)          |
| O4-N2-C1-C2   | -86(2)            | O8-N7-C5-N6   | -84.3(4)          |
| C3-N3-C2-N4   | 3.6(5)            | O8-N7-C5-C0AA | 95.9(3)           |
| C3-N3-C2-C1   | -175.9(3)         | N1-C1-C2-N3   | 1.0(5)            |
| C2-N3-C3-N5   | -9.7(5)           | N1-C1-C2-N4   | -178.6(3)         |
| C2-N4-C0AA-N5 | -4.3(5)           | N2-C1-C2-N3   | -172.5(13)        |
| C2-N4-C0AA-C5 | 176.2(3)          | N2-C1-C2-N4   | 7.9(13)           |
| C0AA-N4-C2-C1 | -176.4(3)         | N4-C0AA-C5-N6 | 179.1(3)          |
| C0AA-N4-C2-N3 | 4.1(5)            | N4-C0AA-C5-N7 | -1.1(4)           |
| C0AA-N5-C3-N3 | 9.4(4)            | N5-C0AA-C5-N6 | -0.4(5)           |
| C3-N5-C0AA-N4 | -3.0(5)           | N5-C0AA-C5-N7 | 179.4(3)          |

**Table S9.** The bonds length in **2·H<sub>2</sub>O**

| Parameter | Bond length (Å) | Parameter | Bond length (Å) |
|-----------|-----------------|-----------|-----------------|
| O1-N1     | 1.241(4)        | N6-C7     | 1.448(4)        |
| O4-N2     | 1.266(4)        | N6-C6     | 1.452(5)        |
| O2-N1     | 1.252(4)        | N6-C5     | 1.471(5)        |
| O8-N10    | 1.247(4)        | N9-C9     | 1.390(4)        |
| O5-N9     | 1.248(4)        | N2-O3     | 1.228(4)        |
| N1-C1     | 1.382(5)        | N2-C1     | 1.375(5)        |

|        |          |        |          |
|--------|----------|--------|----------|
| N8-C8  | 1.316(4) | N5-C3  | 1.444(5) |
| N8-C6  | 1.458(5) | N5-C5  | 1.463(5) |
| N4-C2  | 1.323(4) | N5-C4  | 1.440(5) |
| N4-C4  | 1.473(5) | N10-C9 | 1.366(5) |
| O7-N10 | 1.253(4) | N3-C2  | 1.302(4) |
| N7-C8  | 1.310(4) | N3-C3  | 1.474(5) |
| N7-C7  | 1.474(4) | C2-C1  | 1.467(5) |
| O6-N9  | 1.232(4) | C8-C9  | 1.458(5) |

**Table S10.** The bonds angles in **2H<sub>2</sub>O**

| Parameter | Bond angle (°) | Parameter | Bond length (Å) |
|-----------|----------------|-----------|-----------------|
| O1-N1-O2  | 122.3(3)       | O7-N10-C9 | 123.5(3)        |
| O1-N1-C1  | 122.0(3)       | C2-N3-C3  | 121.7(3)        |
| O2-N1-C1  | 115.6(3)       | N4-C2-C1  | 119.3(3)        |
| C8-N8-C6  | 121.9 (3)      | N3-C2-N4  | 121.0(3)        |
| C2-N4-C4  | 120.3(3)       | N3-C2-C1  | 119.7(3)        |
| C8-N7-C7  | 120.9(3)       | N8-C8-C9  | 118.8(3)        |
| C7-N6-C5  | 114.0(3)       | N7-C8-N8  | 120.6(3)        |
| C6-N6-C7  | 109.4(3)       | N7-C8-C9  | 120.7(3)        |
| C6-N6-C5  | 112.0(3)       | N1-C1-C2  | 118.7(3)        |
| O5-N9-C9  | 115.0(3)       | N2-C1-N1  | 123.9(3)        |
| O6-N9-O5  | 122.6(3)       | N2-C1-C2  | 117.3(3)        |
| O6-N9-C9  | 122.4(3)       | N9-C9-C8  | 117.5(3)        |
| O4-N2-C1  | 114.9(3)       | N10-C9-N9 | 123.5(3)        |
| O3-N2-O4  | 121.2(3)       | N10-C9-C8 | 117.0(3)        |
| O3-N2-C1  | 123.9(3)       | N6-C7-N7  | 111.0(2)        |
| C3-N5-C5  | 114.4(3)       | N6-C6-N8  | 110.3(3)        |
| C4-N5-C3  | 110.0(3)       | N5-C3-N3  | 110.5(3)        |
| C4-N5-C5  | 113.7(3)       | N6-C5-N5  | 107.5(3)        |
| O8-N10-O7 | 120.5(3)       | N5-C4-N4  | 110.8(3)        |
| O8-N10-C9 | 115.9(3)       |           |                 |

**Table S11.** The torsion angles in **2H<sub>2</sub>O**

| Parameter   | Torsion angle (°) | Parameter   | Torsion angle (°) |
|-------------|-------------------|-------------|-------------------|
| O1-N1-C1-N2 | -2.6(4)           | C4-N5-C3-N3 | -53.2(4)          |
| O1-N1-C1-C2 | -178.3(3)         | C5-N5-C3-N3 | 76.2(4)           |



|              |           |              |           |
|--------------|-----------|--------------|-----------|
| O2-N1-C1-N2  | 178.8(3)  | C3-N5-C4-N4  | 54.9(4)   |
| O2-N1-C1-C2  | 3.2(4)    | C5-N5-C4-N4  | -74.9(4)  |
| O3-N2-C1-N1  | 1.4(5)    | C3-N5-C5-N6  | 153.1(3)  |
| O3-N2-C1-C2  | 177.1(3)  | C4-N5-C5-N6  | -79.4(3)  |
| O4-N2-C1-N1  | 179.6(3)  | C6-N6-C5-N5  | -76.4(3)  |
| O4-N2-C1-C2  | -4.7(4)   | C7-N6-C5-N5  | 158.7(3)  |
| C3-N3-C2-N4  | 1.9(5)    | C5-N6-C6-N8  | -72.9(4)  |
| C3-N3-C2-C1  | -179.1(3) | C7-N6-C6-N8  | 54.5(4)   |
| C2-N3-C3-N5  | 25.5(5)   | C5-N6-C7-N7  | 72.5(4)   |
| C4-N4-C2-N3  | -0.2(5)   | C6-N6-C7-N7  | -53.8(4)  |
| C4-N4-C2-C1  | -179.3(3) | C8-N7-C7-N6  | 26.9(4)   |
| C2-N4-C4-N5  | -28.8(4)  | C7-N7-C8-N8  | 0.7(5)    |
| C7-N7-C8-C9  | -178.6(3) | O8-N10-C9-N9 | 170.3(3)  |
| C8-N8-C6-N6  | -28.9(4)  | O8-N10-C9-C8 | 6.9(4)    |
| C6-N8-C8-N7  | 0.5(5)    | N1-C1-C2-N3  | 79.8(4)   |
| C6-N8-C8-C9  | 179.8(3)  | N1-C1-C2-N4  | -101.1(4) |
| O5-N9-C9-N10 | -171.2(3) | N2-C1-C2-N3  | -96.1(4)  |
| O5-N9-C9-C8  | -7.9(4)   | N2-C1-C2-N4  | 83.0(4)   |
| O6-N9-C9-N10 | 9.4(5)    | N7-C8-C9-N9  | 96.2(4)   |
| O6-N9-C9-C8  | 172.7(3)  | N7-C8-C9-N10 | -99.3(4)  |
| O7-N10-C9-N9 | -11.2(5)  | N8-C8-C9-N9  | -83.1(4)  |
| O7-N10-C9-C8 | -174.6(3) | N8-C8-C9-N10 | 81.4(4)   |

**Table S12.** The hydrogen bonds in **2H<sub>2</sub>O**

| D-H...A     | D-H(Å) | H...A(Å) | D...A(Å) | D-H...A(o) |
|-------------|--------|----------|----------|------------|
| N3—H3...O1  | 0.8800 | 2.5500   | 2.916(4) | 106.00     |
| N3—H3...O4  | 0.8800 | 2.0600   | 2.897(4) | 159.00     |
| N4—H4...O2  | 0.8800 | 2.4900   | 3.110(4) | 128.00     |
| N4—H4...O4  | 0.8800 | 2.3900   | 3.103(4) | 138.00     |
| N7—H7...O9  | 0.8800 | 1.9400   | 2.788(4) | 160.00     |
| N8—H8...O6  | 0.8800 | 2.5600   | 3.248(4) | 135.00     |
| N8—H8...O7  | 0.8800 | 2.0100   | 2.829(4) | 153.00     |
| O9—H9A...O7 | 0.8700 | 2.5300   | 3.211(4) | 136.00     |
| O9—H9B...N6 | 0.7700 | 2.2200   | 2.969(4) | 164.00     |
| C3—H3A...O9 | 0.9900 | 2.4700   | 3.444(5) | 166.00     |

|             |        |        |          |        |
|-------------|--------|--------|----------|--------|
| C5—H5A···O1 | 0.9900 | 2.5100 | 3.327(5) | 139.00 |
| C5—H5B···N8 | 0.9900 | 2.6200 | 2.988(5) | 102.00 |
| C6—H6A···O8 | 0.9900 | 2.2400 | 3.209(5) | 167.00 |
| C6—H6B···O6 | 0.9900 | 2.4600 | 3.426(5) | 165.00 |
| C6—H6B···N5 | 0.9900 | 2.6200 | 2.984(5) | 102.00 |
| C7—H7A···O1 | 0.9900 | 2.4700 | 3.338(6) | 146.00 |
| C7—H7A···O3 | 0.9900 | 2.4300 | 3.317(5) | 148.00 |
| C7—H7B···O6 | 0.9900 | 2.4800 | 3.472(4) | 176.00 |

**Table S13.** The bonds length in **2**

| Parameter | Bond length (Å) | Parameter          | Bond length (Å) |
|-----------|-----------------|--------------------|-----------------|
| O4-N5     | 1.258(4)        | N1-C4              | 1.424(4)        |
| N3-C3     | 1.330(5)        | N2-C3              | 1.309(5)        |
| N3-C4     | 1.464(5)        | N2-C2              | 1.471(5)        |
| N5-O3     | 1.227(5)        | N4-C5              | 1.414(5)        |
| N5-C5     | 1.402(5)        | N4-O2              | 1.341(13)       |
| O1-N4     | 1.220(5)        | N4-O2A             | 1.183(12)       |
| N1-C1     | 1.472(5)        | C3-C5              | 1.453(5)        |
| N1-C2     | 1.441(5)        | C1-N1 <sup>1</sup> | 1.472(5)        |

<sup>1</sup>1/2-X,3/2-Y,+Z

**Table S14.** The bonds angles in **2**

| Parameter | Bond angle (°) | Parameter              | Bond length (Å) |
|-----------|----------------|------------------------|-----------------|
| C3-N3-C4  | 122.7(3)       | O2A-N4-O1              | 111.7(8)        |
| O4-N5-C5  | 118.4(3)       | O2A-N4-C5              | 121.9(7)        |
| O3-N5-O4  | 120.1(3)       | N3-C3-C5               | 119.7(4)        |
| O3-N5-C5  | 121.5 (3)      | N2-C3-N3               | 117.4(3)        |
| C2-N1-C1  | 111.8(2)       | N2-C3-C5               | 122.9(3)        |
| C4-N1-C1  | 114.6(3)       | N5-C5-N4               | 116.5(3)        |
| C4-N1-C2  | 108.7(3)       | N5-C5-C3               | 123.2(3)        |
| C3-N2-C2  | 122.5(3)       | N4-C5-C3               | 120.1(3)        |
| O1-N4-C5  | 120.4(4)       | N1 <sup>1</sup> -C1-N1 | 106.4(4)        |
| O1-N4-O2  | 119.2(6)       | N1-C2-N2               | 112.1(3)        |
| O2-N4-C5  | 116.7(6)       | N1-C4-N3               | 113.0(3)        |

**Table S15.** The torsion angles in **2**

| Parameter    | Torsion angle (°) | Parameter   | Torsion angle (°) |
|--------------|-------------------|-------------|-------------------|
| C2-N1-C1-N1a | 78.0(3)           | O1-N4-C5-N5 | -179.6(4)         |
| C4-N1-C1-N1a | -157.8(3)         | O1-N4-C5-C3 | 4.5(6)            |
| C1-N1-C2-N2  | 75.4(4)           | O2-N4-C5-N5 | -21.3(8)          |
| C4-N1-C2-N2  | -52.1(4)          | O2-N4-C5-C3 | 162.8(7)          |
| C1-N1-C4-N3  | -75.4(4)          | O3-N5-C5-N4 | 7.0(5)            |
| C2-N1-C4-N3  | 50.5(4)           | O3-N5-C5-C3 | -177.2(4)         |
| C3-N2-C2-N1  | 32.2(5)           | O4-N5-C5-N4 | -171.4(3)         |
| C2-N2-C3-N3  | -7.4(6)           | O4-N5-C5-C3 | 4.4(5)            |
| C2-N2-C3-C5  | 175.6(3)          | N2-C3-C5-N4 | -1.3(6)           |
| C4-N3-C3-N2  | 5.3(5)            | N2-C3-C5-N5 | -177.0(4)         |
| C4-N3-C3-C5  | -177.6(3)         | N3-C3-C5-N4 | -178.3(4)         |
| C3-N3-C4-N1  | -28.5(5)          | N3-C3-C5-N5 | 6.1(6)            |

**Table S16.** The hydrogen bonds in **2**

| D-H...A     | D-H(Å) | H...A(Å) | D...A(Å)  | D-H...A(o) |
|-------------|--------|----------|-----------|------------|
| N2—H2...O1  | 0.8800 | 1.9100   | 2.567(4)  | 131.00     |
| N2—H2...O3  | 0.8800 | 2.4900   | 3.263(5)  | 146.00     |
| N3—H3...O4  | 0.8800 | 1.8900   | 2.556(4)  | 131.00     |
| N3—H3...N5  | 0.8800 | 2.5300   | 2.882(5)  | 105.00     |
| C2—H2A...N1 | 0.9900 | 2.6000   | 2.977(5)  | 102.00     |
| C2—H2A...O2 | 0.9900 | 2.5400   | 3.309(12) | 134.00     |
| C4—H4A...O4 | 0.9900 | 2.3700   | 3.306(5)  | 158.00     |
| C4—H4B...O2 | 0.9900 | 2.5500   | 3.226(10) | 125.00     |

**Table S17.** The bonds length in **3**

| Parameter | Bond length (Å) | Parameter | Bond length (Å) |
|-----------|-----------------|-----------|-----------------|
| O1-N2     | 1.232(4)        | N3-C2     | 1.315(4)        |
| O2-N2     | 1.237(4)        | N3-C4     | 1.465(4)        |
| O3-N1     | 1.234(4)        | N4-C2     | 1.330(4)        |
| O4-N1     | 1.225(4)        | N4-C3     | 1.456(5)        |
| O5-N7     | 1.204(5)        | N5-C3     | 1.434(4)        |
| O6-N7     | 1.189(5)        | N5-C4     | 1.452(4)        |
| O7-N6     | 1.202(5)        | N5-C5     | 1.454(4)        |
| O8-N6     | 1.215(5)        | N6-C6     | 1.506(6)        |

|        |          |       |          |
|--------|----------|-------|----------|
| O9-N8  | 1.193(6) | N7-C6 | 1.507(5) |
| O10-N8 | 1.211(5) | N8-C6 | 1.529(6) |
| N1-C1  | 1.397(5) | C1-C2 | 1.444(5) |
| N2-C1  | 1.403(4) | C5-C6 | 1.518(5) |

**Table S18.** The bonds angles in **3**

| Parameter | Bond angle (°) | Parameter | Bond length (Å) |
|-----------|----------------|-----------|-----------------|
| O3-N1-C1  | 121.3(3)       | O9-N8-C6  | 116.3(4)        |
| O4-N1-O3  | 118.5(4)       | O10-N8-C6 | 117.3(6)        |
| O4-N1-C1  | 119.9(3)       | N1-C1-N2  | 116.0(3)        |
| O1-N2-O2  | 120.2(3)       | N1-C1-C2  | 122.1(3)        |
| O1-N2-C1  | 121.2(3)       | N2-C1-C2  | 121.9(3)        |
| O2-N2-C1  | 118.5(3)       | N3-C2-N4  | 118.3(3)        |
| C2-N3-C4  | 123.4(3)       | N3-C2-C1  | 121.6(3)        |
| C2-N4-C3  | 120.9(3)       | N4-C2-C1  | 120.1(3)        |
| C3-N5-C4  | 108.5(3)       | N5-C3-N4  | 111.5(3)        |
| C3-N5-C5  | 113.4(3)       | N5-C4-N3  | 111.0(3)        |
| C4-N5-C5  | 113.2(3)       | N5-C5-C6  | 110.9(3)        |
| O7-N6-O8  | 127.9(5)       | N6-C6-N7  | 105.5(4)        |
| O7-N6-C6  | 117.9(5)       | N6-C6-N8  | 105.6(4)        |
| O8-N6-C6  | 114.2(4)       | N6-C6-C5  | 111.0(4)        |
| O5-N7-C6  | 116.0(5)       | N7-C6-N8  | 107.6(4)        |
| O6-N7-O5  | 127.5(5)       | N7-C6-C5  | 112.6(3)        |
| O6-N7-C6  | 116.3(4)       | C5-C6-N8  | 114.0(3)        |
| O9-N8-O10 | 126.4(6)       |           |                 |

**Table S19.** The torsion angles in **3**

| Parameter   | Torsion angle (°) | Parameter    | Torsion angle (°) |
|-------------|-------------------|--------------|-------------------|
| O1-N2-C1-N1 | -22.9 (5)         | O10-N8-C6-N6 | -13.4(6)          |
| O1-N2-C1-C2 | 155.3(3)          | O10-N8-C6-N7 | 98.9(5)           |
| O2-N2-C1-N1 | 159.7(4)          | O10-N8-C6-C5 | -135.5(5)         |
| O2-N2-C1-C2 | -22.0(5)          | N1-C1-C2-N3  | 8.6(5)            |
| O3-N1-C1-N2 | -22.8(6)          | N1-C1-C2-N4  | -171.1(3)         |
| O3-N1-C1-C2 | 158.9(4)          | N2-C1-C2-N3  | -169.5(3)         |
| O4-N1-C1-N2 | 163.2(4)          | N2-C1-C2-N4  | 10.7(5)           |
| O4-N1-C1-C2 | -15.0(6)          | N5-C5-C6-N6  | 165.2(3)          |

|             |           |             |           |
|-------------|-----------|-------------|-----------|
| O5-N7-C6-N6 | 109.2(6)  | N5-C5-C6-N7 | 47.2(5)   |
| O5-N7-C6-N8 | -3.2(6)   | N5-C5-C6-N8 | -75.7(4)  |
| O5-N7-C6-C5 | -129.7(5) | C2-N3-C4-N5 | 23.2(5)   |
| O6-N7-C6-N6 | -75.1(5)  | C2-N4-C3-N5 | -33.9(4)  |
| O6-N7-C6-N8 | 172.6(4)  | C3-N4-C2-N3 | 3.4(5)    |
| O6-N7-C6-C5 | 46.1(6)   | C3-N4-C2-C1 | -176.9(3) |
| O7-N6-C6-N7 | -17.7(7)  | C3-N5-C4-N3 | -51.2(4)  |
| O7-N6-C6-N8 | 96.1(6)   | C3-N5-C5-C6 | -115.5(3) |
| O7-N6-C6-C5 | -139.9(6) | C4-N3-C2-N4 | 1.9(5)    |
| O8-N6-C6-N7 | 163.7(5)  | C4-N3-C2-C1 | -177.9(3) |
| O8-N6-C6-N8 | -82.5(6)  | C4-N5-C3-N4 | 56.7(4)   |
| O8-N6-C6-C5 | 41.6(6)   | C4-N5-C5-C6 | 120.3(3)  |
| O9-N8-C6-N6 | 167.5(5)  | C5-N5-C3-N4 | -70.0(4)  |
| O9-N8-C6-N7 | -80.1(6)  | C5-N5-C4-N3 | 75.6(4)   |
| O9-N8-C6-C5 | 45.4(6)   |             |           |

**Table S20.** The hydrogen bonds in **3**

| D-H...A     | D-H(Å) | H...A(Å) | D...A(Å) | D-H...A(o) |
|-------------|--------|----------|----------|------------|
| N3—H3...O4  | 0.8800 | 1.9300   | 2.598(4) | 131.00     |
| N3—H3...N1  | 0.8800 | 2.5500   | 2.882(5) | 103.00     |
| N3—H3...O2  | 0.8800 | 2.4500   | 2.960(5) | 118.00     |
| N4—H4...O2  | 0.8800 | 1.9000   | 2.561(4) | 131.00     |
| N4—H4...N2  | 0.8800 | 2.5400   | 2.860(5) | 103.00     |
| N4—H4...O10 | 0.8800 | 2.4100   | 3.113(6) | 138.00     |
| C3—H3A...O7 | 0.9900 | 2.5400   | 3.307(6) | 134.00     |
| C3—H3B...O6 | 0.9900 | 2.3900   | 3.112(5) | 129.00     |
| C4—H4A...O9 | 0.9900 | 2.5800   | 3.140(6) | 116.00     |
| C4—H4B...O5 | 0.9900 | 2.3800   | 3.191(6) | 139.00     |
| C5—H5A...O4 | 0.9900 | 2.3400   | 3.312(5) | 166.00     |
| C5—H5B...O3 | 0.9900 | 2.3400   | 3.247(5) | 152.00     |

## II. Theoretical study

Theoretical calculations were performed by using the Gaussian 09 (Revision D.01) suite of programs.<sup>1</sup> Based on the method of isodesmic reactions (Scheme S1), gas-phase heats of formation of the neutral compounds were computed. The gas-phase enthalpies of the building-block molecules were obtained by using the atomization method with the G2 ab initio calculations. Then the remaining task is to determine the solid-state heats of formation for the synthesized compounds.

The solid-state enthalpy of formation for neutral compound can be estimated by subtracting the heat of sublimation from gas-phase heat of formation.

$$\Delta H_f = \Delta H_f(\text{g}) - \Delta H_{\text{sub}} \quad (1)$$

On the basis of the literature,<sup>2</sup> the heat of sublimation can be estimated with Trouton's rule according to eq 1, where T represents either the melting point or the decomposition temperature when no melting occurs prior to decomposition:

$$\Delta H_{\text{sub}} = 188/\text{J mol}^{-1}\text{K}^{-1} \times T \quad (2)$$

The detailed principle can be consulted from literatures<sup>1-4</sup>.

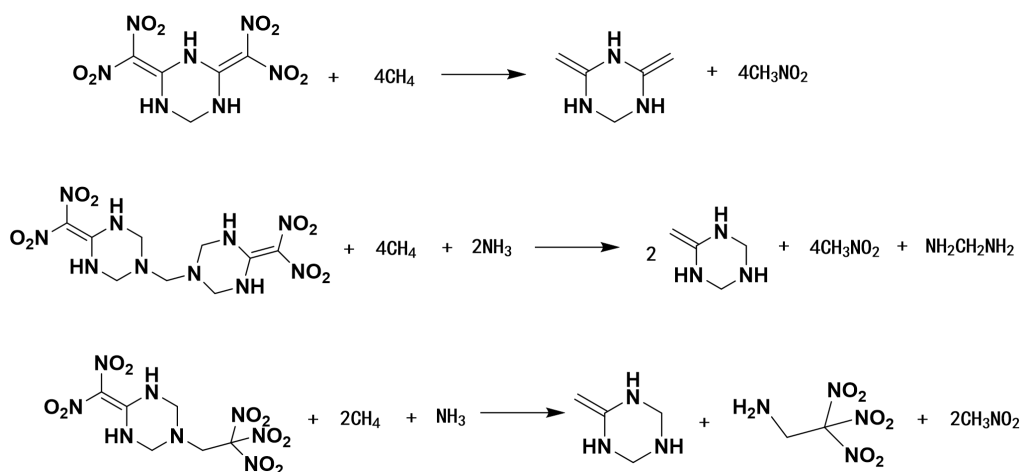

**Scheme S1.** Isodesmic reactions

## References

- [1] M. J. Frisch, G. W. Trucks, H. B. Schlegel, A. D. Daniels, O. Farkas, J. B. Foresman, J. V. Ortiz, J. Cioslowski, D. J. Fox, *Gaussian 09, Revision D. 01*, Gaussian, Inc., Wallingford CT, **2009**
- [2] a) F. Trouton, *Philos. Mag.* **1884**, *18*, 54-57. b) M. S. Westwell, M. S. Searle, D. J. Wales, D. H. Williams, *J. Am. Chem. Soc.* **1995**, *117*, 5013-5015.
- [3] R. G. Parr, W. Yang, *Density Functional Theory of Atoms and Molecules*, Oxford University Press, New York, **1989**
- [4] H. D. B. Jenkins, D. Tudela, L. Glasser, *Inorg. Chem.* **2002**, *41*, 2364-2367.
